# Supplementary material
Source: publisher site journal article supplement (https://www.dovepress.com/article/539059)
Supplement: Supplementary file 1 [file APPENDIX.pdf]

## **APPENDIX 1: Evaluation Form for Cardiovascular Case Analysis Competence**

Name: \_\_\_\_\_

Department: \_\_\_\_\_

Date: \_\_\_\_\_

Total Score: \_\_\_\_\_

### I. History Taking (10 points)

1. Comprehensiveness: Did the trainee comprehensively inquire about the patient's chief complaint, present illness, past medical history, family history, and personal history? (0-2 points)

- 0: Missed critical information
- 1: Basic but not detailed
- 2: Comprehensive and detailed

2. Relevance: Did the trainee focus on cardiovascular-specific symptoms (e.g., chest pain, dyspnea, edema)? (0-2 points)

- 0: No relevant questions asked
- 1: Partially relevant
- 2: Fully relevant

3. Logical Flow: Was the history-taking process logical and able to clearly reflect the progression of the condition? (0-2 points)

- 0: Disorganized
- 1: Basic logical flow
- 2: Clear and logical

4. Patient Communication: Did the trainee use clear, non-medical jargon to communicate with the patient? (0-2 points)

- 0: Poor communication
- 1: Basic communication
- 2: Effective communication

5. Documentation: Was the medical history recorded completely and accurately? (0-2 points)

- 0: Incomplete documentation
- 1: Mostly complete
- 2: Complete and accurate

### II. Physical Examination (10 points)

6. Systematic Approach: Did the trainee perform a systematic physical examination following a standard sequence? (0-2 points)

- 0: Missed major systems
- 1: Basic completion
- 2: Comprehensive and systematic

7. Cardiovascular Focus: Did the trainee emphasize cardiovascular examination (e.g., heart rate,

rhythm, heart sounds, murmurs, peripheral vascular signs)? (0-2 points)

- 0: No focus on cardiovascular system
- 1: Partial focus
- 2: Thorough focus

8. Procedural Accuracy: Were the physical examination techniques performed accurately and correctly? (0-2 points)

- 0: Incorrect techniques
- 1: Mostly correct
- 2: Accurate and correct

9. Identification of Abnormalities: Did the trainee identify and document abnormal physical findings? (0-2 points)

- 0: Missed abnormalities
- 1: Identified some abnormalities
- 2: Identified and documented all abnormalities

10. Integration with History: Did the trainee correlate physical examination findings with the patient's history? (0-2 points)

- 0: No correlation
- 1: Partial correlation
- 2: Strong correlation

### III. Diagnostic Analysis (15 points)

11. Preliminary Diagnosis: Did the trainee propose a reasonable preliminary diagnosis based on history and physical examination? (0-3 points)

- 0: Unreasonable diagnosis
- 1: Partially reasonable
- 2: Mostly reasonable
- 3: Fully reasonable

12. Differential Diagnosis: Did the trainee list and analyze relevant differential diagnoses? (0-3 points)

- 0: No differentials listed
- 1: Listed but incomplete
- 2: Listed with partial analysis
- 3: Comprehensive list with thorough analysis

13. Selection of Diagnostic Tests: Did the trainee choose appropriate diagnostic tests (e.g., ECG, echocardiography, coronary angiography)? (0-3 points)

- 0: Inappropriate selection
- 1: Partially appropriate
- 2: Mostly appropriate
- 3: Fully appropriate

14. Interpretation of Results: Did the trainee correctly interpret diagnostic test results? (0-3 points)

- 0: Incorrect interpretation
- 1: Partially correct
- 2: Mostly correct
- 3: Fully correct

15. Final Diagnosis: Did the trainee arrive at an accurate final diagnosis based on all available information? (0-3 points)

- 0: Incorrect diagnosis
- 1: Partially correct
- 2: Mostly correct
- 3: Fully correct

IV. Treatment Plan (10 points)

16. Appropriateness of Treatment Plan: Did the trainee develop a reasonable treatment plan (e.g., medications, surgery, intervention)? (0-3 points)

- 0: Unreasonable plan
- 1: Partially reasonable
- 2: Mostly reasonable
- 3: Fully reasonable

17. Individualized Treatment: Did the trainee tailor the treatment plan to the patient's specific condition? (0-2 points)

- 0: Not individualized
- 1: Partially individualized
- 2: Fully individualized

18. Medication Selection: Did the trainee choose appropriate medications (e.g., correct dosage, indications, contraindications)? (0-2 points)

- 0: Incorrect selection
- 1: Partially appropriate
- 2: Fully appropriate

19. Patient Education: Did the trainee explain the treatment plan and precautions to the patient? (0-2 points)

- 0: No explanation
- 1: Partial explanation
- 2: Thorough explanation

20. Follow-Up Plan: Did the trainee develop an appropriate follow-up plan? (0-1 point)

- 0: No follow-up plan
- 1: Appropriate follow-up plan

V. Overall Evaluation

- Total Score:
- Comments:

---

---

---

Evaluator's Signature: \_\_\_\_\_

---

Scoring Guidelines:

- Each item is scored based on performance, with a total of 50 points.
- The comments section can provide detailed feedback on strengths and areas for improvement.

## APPENDIX 2: Course Satisfaction Survey

**Dear trainees,**

To better understand your experience and feedback on this course, we have designed this survey. Your responses will help us improve the course and provide you with a better learning experience. This survey is anonymous, and all data will be used solely for statistical analysis. Please feel free to provide your honest opinions.

**Instructions:** Please indicate your level of agreement with each statement by selecting the most appropriate option on a scale of 1 to 5, where:

| Question                                                                                                 | Strongly Disagree | Disagree | Neutral | Agree | Strongly Agree |
|----------------------------------------------------------------------------------------------------------|-------------------|----------|---------|-------|----------------|
| <b>Part 1: Course Arrangement</b>                                                                        |                   |          |         |       |                |
| I believe the course content is well-organized, with an appropriate level of difficulty.                 | 1                 | 2        | 3       | 4     | 5              |
| I find the course pace reasonable and can keep up with the instructor's teaching speed.                  | 1                 | 2        | 3       | 4     | 5              |
| I think the assignments and assessment methods effectively evaluate my learning outcomes.                | 1                 | 2        | 3       | 4     | 5              |
| <b>Part 2: Instructor</b>                                                                                |                   |          |         |       |                |
| The instructor delivers lectures clearly and explains concepts in an engaging and understandable way.    | 1                 | 2        | 3       | 4     | 5              |
| The instructor patiently answers students' questions and provides effective learning guidance.           | 1                 | 2        | 3       | 4     | 5              |
| The instructor creates a positive and interactive classroom atmosphere that motivates students to learn. | 1                 | 2        | 3       | 4     | 5              |
| <b>Part 3: Self-Perceived Improvement</b>                                                                |                   |          |         |       |                |
| Through this course, I feel that my knowledge and skills in the relevant field have improved.            | 1                 | 2        | 3       | 4     | 5              |
| Through this course, I feel that my ability to analyze and solve problems has improved.                  | 1                 | 2        | 3       | 4     | 5              |
| <b>Part 4: Interest in Learning</b>                                                                      |                   |          |         |       |                |
| This course has increased my interest in learning more about this field.                                 | 1                 | 2        | 3       | 4     | 5              |
| I am willing to continue studying and exploring knowledge in this field.                                 | 1                 | 2        | 3       | 4     | 5              |

**Thank you for your participation!**
