# Supplementary material
Source: publisher site journal article supplement (https://www.dovepress.com/article/539059)
Supplement: Supplementary file 2 [file Table%20s1.docx]

### **Table S1** Comparison Between TT and CP-CBL models

|  | TT | CP-CBL |
| --- | --- | --- |
| Basis | Teaching Syllabus | Teaching Syllabus |
| Material Source | Textbooks | CP-list and CBL case bank |
| Leadership | Instructor-led | Trainee-led |
| Teaching Method | Lecture-based | Mini-lectures on CP-list + Case-based discussion |
| Teaching Sequence | Disease-based teaching | Month 1: CP teaching with list;  Months 2-3: CBL-focused case discussions |

Abbreviations: TT, traditional teaching; CP-CBL, clinical pathway and case-based learning.
